# Supplementary material for: Multiproxy evidence for leaf-browsing and closed habitats in extinct proboscideans (Mammalia, Proboscidea) from Central Chile
Source: PubMed Central journal article supplement — Proc Natl Acad Sci U S A. 2018 Aug 27;115(37):9258–63. doi: 10.1073/pnas.1804642115 (PMC6140480; doi:10.1073/pnas.1804642115), 2018-08-27
Supplement: pnas.1804642115.sapp.pdf [file pnas.1804642115.sapp.pdf]

1 **SUPPORTING INFORMATION FOR**

2

3 **Multiproxy evidence for leaf browsing and closed habitats in extinct**

4 **proboscideans (Mammalia, Proboscidea) from Central Chile**

5

6 Erwin González-Guarda, Alia Petermann-Pichincura, Carlos Tornero, Laura Domingo, Jordi Agustí, Mario

7 Pino, Ana M. Abarzúa, José M. Capriles, Natalia Villavicencio, Rafael Labarca, Violeta Tolorza, Paloma

8 Sevilla, Florent Rivals

9

10 Corresponding author. Email: erwingonzalezguarda@gmail.com

11

12 **Geographic setting, climate and vegetation of the study area**

13

14 From the late Miocene onwards, the vegetation of the study area (Fig. S1)

15 began to be determined by the effect of the so-called Arid Diagonal. During the

16 Quaternary, due to the extent geographical isolation of this region and the

17 damping effect of the Pacific Ocean on the temperature of the western margin

18 of the continent, particularly at middle latitudes in the Coastal Range of Chile,

19 this region was a key refuge for biota during glaciations. Radiocarbon dating of

20 the fossil record on gomphotheres from Chile, only encompasses a

21 chronological range between ~30,000–12,000 cal yr BP (Fig. S2). In this time

22 range, the climate was colder and wetter than today. During the Last Glacial

23 Maximum (LGM, 26,500–19,000 cal yr BP; at a global level) precipitations were

24 double and summer temperatures were 6°–8° C colder than today (1). One of

25 the most striking aspects of the late Pleistocene was the high humidity recorded

26 at latitudes between 31°–36° S (Fig. S1), which favored the expansion of vast

27 forested areas. Between 38°–42°S, glaciers occupied the Andean range and

28 part of the Central Depression between 33,600–19,000 cal yr BP (2), deeply  
29 affecting the vegetation assemblage. However, the oceanic influence along with  
30 the physical heterogeneity of the landscape provided a mosaic of habitats for  
31 forest refugia during this glacial period (3). An increase in temperatures about  
32 ~18,000 cal yr BP (Last Glacial Termination) triggered the onset of the  
33 deglaciation (4), but the climate continued to be colder and wetter than today.  
34 North Patagonian temperate rainforests were fully established after the glacial  
35 retreat (2). By ~16,800 cal yr BP, temperatures approached average interglacial  
36 values, albeit with cold reversions between ~14,700 and 11,500 cal yr BP, as  
37 documented in northwestern Patagonia (2). During the early Holocene  
38 (~11,700–9,000 cal yr BP), between 31°–34°S, a process of abrupt climatic  
39 change has been detected by the pollen records recovered from continental  
40 sites, which suggest the presence of large areas of grassland and regional  
41 conditions becoming drier and warmer (5). A similar trend was noted when  
42 estimating sea surface temperatures (6). Between 38°–42° S, a drier and  
43 warmer phase was also recorded by sea surface temperatures (from  
44 alkenones) (4), and the most thermophilic taxa of the Valdivian forest (as  
45 evidenced by the palynological record) began to dominate from ~11,000 cal yr  
46 BP (2).

47

#### 48 **Preservation of the isotopic signal**

49

50 The samples analyzed in this study show an average  $\Delta^{18}\text{O}_{\text{CO}_3\text{-PO}_4}$  value of  
51 ~9.0‰. This value is within the established  $\Delta^{18}\text{O}_{\text{CO}_3\text{-PO}_4}$  range for unaltered  
52 biapatite of present-day mammals (i.e., 8.6 – 9.1‰) (7), pointing to the

53 preservation of original  $\delta^{18}\text{O}_{\text{CO}_3}$  and  $\delta^{18}\text{O}_{\text{PO}_4}$  values. The correlation coefficient  
54 between these values is high ( $R = 0.9$ ,  $p < 0.001$ ), which suggests that the  
55  $\text{CO}_3^{-2}$  and  $\text{PO}_4^{-3}$  in bioapatite are cogenetic equilibrium precipitates from body  
56 water at relatively invariant mammalian body temperatures. Carbon:nitrogen  
57 (C:N) ratios of the selected fossil material are within the accepted range for  
58 modern collagen (2.9 and 3.6 in living mammals) (8) supporting the  
59 preservation of the original  $\delta^{13}\text{C}$  and  $\delta^{15}\text{N}$  biogenic signal. Some samples had a  
60 value slightly below 2.9, however, we included them in the analysis since they  
61 had percentages of  $\text{C}_{\text{coll}}$  and  $\text{N}_{\text{coll}}$  higher than the accepted 13% and 4.8%  
62 values for unaltered collagen, respectively (9).

63

## 64 **Results**

65

### 66 *Stable Isotopes Analysis*

67 The Mann-Whitney U test shows significant differences between NC and SC  
68 gomphotheres in terms of both  $\delta^{13}\text{C}_{\text{bio}}$  and  $\delta^{18}\text{O}_{\text{bio}}$  values (Table S1). Regarding  
69 the NC area, gomphothere  $\delta^{13}\text{C}_{\text{bio}}$  values point to the existence of a closed-  
70 canopy forest (3% of samples) and woodland-mesic  $\text{C}_3$  grassland (84% of  
71 samples), open woodland-xeric  $\text{C}_3$  grassland (8% samples), and mixed  $\text{C}_3\text{--C}_4$   
72 grassland (5% of samples) (Fig. 2). As far as the SC area is concerned,  
73 gomphothere  $\delta^{13}\text{C}_{\text{bio}}$  values point to the presence of a closed-canopy forest  
74 (13% of samples), and woodland-mesic  $\text{C}_3$  grassland (87% of samples) (Fig. 2).  
75 Figure A shows the  $\delta^{13}\text{C}_{\text{bio}}$  (‰, VPDB) and  $\delta^{18}\text{O}_{\text{CO}_3}$  (‰, VSMOW) values.  
76 The Mann-Whitney U test shows significant differences between NC and SC  
77 gomphotheres in terms of both  $\delta^{13}\text{C}_{\text{coll}}$  and  $\delta^{15}\text{N}$  values (Figure 4B; Table S1),

78 with NC depicting higher values. The Mann-Whitney U test reveals a significant  
79 difference between NC and SC gomphotheres in terms of the estimated dietary  
80 modern equivalent (i.e., vegetation) carbon stable isotope value ( $\delta^{13}\text{C}_{\text{diet,meq}}$ )  
81 (Table S2), with NC showing a higher  $\delta^{13}\text{C}_{\text{diet,meq}}$  value. The Mann-Whitney U  
82 test also shows a significant difference between NC and SC in terms of mean  
83 annual temperature values (Table S3), with the NC area recording a higher  
84 temperature.

85

### 86 *Dental Microwear Analysis*

87 Figure S3 shows photomicrographs of gomphothere tooth enamel, which  
88 generally display high percentages of coarse and hyper-coarse scratches and  
89 low numbers of pits and fine scratches. The raw data are presented in Table  
90 S5, whereas a summary of dental microwear results is presented in Table S6.  
91 The average values for the numbers of pits and scratches show a large range  
92 of variation in gomphotheres. When compared to known values of the average  
93 number of pits versus the average number of scratches per taxon for extant  
94 ungulates (10), it is observed that our results do not fall in the 95% confidence  
95 ellipse of the extant leaf browsers (Fig. 3A). However, while the mean does not  
96 fall within the typical range of modern leaf browsers, values recorded are closer  
97 to this type of diet. The SWS (scratch width score = 1.7) from NC falls slightly  
98 within a grazing dietary behavior and within a fruit browsing diet. The SWS (2.0)  
99 from SC falls inside the fruit browsing diet (10). However, the high percentages  
100 of hyper-coarse suggest a browsing behavior (e.g., bark or branches of plants)  
101 (10). Moreover, when analyzing the percentage of individuals with low numbers  
102 of scratches (%0–17), the diet of the gomphotheres of the two areas analyzed

103 here correspond to a leaf browsing diet (Table S5). Since this last calculation is  
104 more conclusive to delimit a grazing or browsing behavior (11), the results point  
105 to a leaf browsing diet in both areas.

106

### 107 *Analysis of Microfossils from Dental Calculus*

108 All analyzed samples show the presence of phytoliths. Additionally, ancient  
109 starch and other siliceous particles like sponge spicules and diatoms were also  
110 present. Most of the samples (i.e., 88%) show a predominance of tree and  
111 shrub elements (Table S6). Morphotypes such as polygonal, polyhedral,  
112 spherical or vascular tissue (Fig. 3B) support a diet based on trees and shrubs  
113 (Fig. S4). More specifically, the tracheids observed in samples LP13, LP14,  
114 TR1 and SGOPV47h, are a diagnostic character of conifers. The simultaneous  
115 presence of phytoliths from trees/shrubs and the Poaceae/Cyperaceae families  
116 shows a mixed consumption of woody plants and herbs. Grass phytoliths found  
117 in the samples include short cells identified as belonging to the Pooideae and  
118 Bambusoideae subfamilies (*Chusquea sp.*). A high quantity of secondary  
119 elements like sponge spicules and diatoms (Table S6) is likely indicative of a  
120 fortuitous ingestion in wetland environments (12).

121

## 122 **Materials and Methods**

123

### 124 *Materials*

125 A multi-proxy approach involving Stable Isotope Analysis (SIA), Dental  
126 Microwear Analysis (DMA) and Analysis of Microfossils from Dental Calculus

127 (AMDC) was carried out on 79 teeth of the gomphothere *Notiomastodon*  
128 *platensis*.  
129 SIA. The measurements obtained from this analysis provide information about  
130 dietary resources and trophic level of the analyzed specimens, and also  
131 features related to environmental and climatic variability. Stable isotope  
132 analyses carried out on tooth enamel and collagen in dentine samples mainly  
133 record the early stages of a mammal's life, whereas stable isotope analyses  
134 performed on bone collagen reflect a mammal's lifetime average or even the  
135 last stages of the animal's life (8).  
136 DMA. This is a method that provides an insight, through the study of tooth  
137 enamel surfaces, into the dietary patterns of a mammal over the last days or  
138 weeks before its death. Dental microwear provides a glimpse into available  
139 vegetation and habitat, as well as short-term dietary traits (11, 13).  
140 AMDC. Plants micro remains attached in dental calculus can provide direct  
141 information on feeding habits (14) and a long-term dietary signal (15). The  
142 accurate timespan involved in dental calculus is not yet clarified, as the  
143 formation processes and its composition can be highly variable among and  
144 within individuals (16). For this reason, it is not possible to determine when,  
145 within the lifetime of an animal, a specific plant micro remain was ingested (17).  
146 Considering that older individuals present more microremains (16), dental  
147 calculus can to represent a mean of multiple feeding events in the animal's life,  
148 assuming there is no replacement or removal of calculus deposits.  
149 15 teeth were analyzed by all three analytical proxies; 29 teeth were analyzed  
150 by two (DMA and AMDC) and 35 teeth were analyzed only by SIA (Dataset).  
151 Samples selected for this study come from 30 sites located at latitudes between

152 31°S and 36°S (North–Central = NC; Mediterranean climate), and between  
153 38°S and 42°S (South–Central = SC; Temperate climate) (Fig. 1; Dataset). The  
154 chronology of the selected specimens spans a time range from ~ 30,000–  
155 12,000 cal yr BP, bracketing the Pleistocene-Holocene transition. The whole  
156 dataset of selected samples with their respective analyses is listed in Dataset.  
157 The multi-proxy analysis was not possible in all teeth, as some of them  
158 presented evident taphonomic and diagenetical alterations (Dataset). In order to  
159 avoid the influence of mother’s milk on the isotopic signal, we selected mostly  
160 teeth that developed during adulthood (i.e. M2/m2; M3/m3) (Dataset).

161

## 162 *Methods*

163 *SIA.* A rotary hand drill with a diamond-tipped dental burr was used to recover  
164 enamel from an area of the tooth as large as possible to avoid seasonal bias at  
165 the time of mineralization. Five to six milligrams of tooth enamel were sampled  
166 for bioapatite  $\delta^{13}\text{C}$  and  $\delta^{18}\text{O}$  analyses, whereas around 50–100 mg of bone  
167 chips were collected for collagen  $\delta^{13}\text{C}$  and  $\delta^{15}\text{N}$  analyses. Stable isotope results  
168 are reported in the  $\delta$ -notation  $\delta^{\text{H}}\text{X}_{\text{sample}} = [(\text{R}_{\text{sample}} - \text{R}_{\text{standard}}) / \text{R}_{\text{standard}}] \times 1000$ , where  
169 X is the element, H is the mass of the rare, heavy isotope, and  $\text{R} = {}^{13}\text{C}/{}^{12}\text{C}$ ,  
170  ${}^{18}\text{O}/{}^{16}\text{O}$  or  ${}^{15}\text{N}/{}^{14}\text{N}$ .  $\delta^{13}\text{C}$  and  $\delta^{18}\text{O}$  values are expressed in the Vienna-Pee Dee  
171 Belemnite (VPDB) standard, although  $\delta^{18}\text{O}$  values are also given in terms of the  
172 VSMOW (Vienna Standard Mean Ocean Water) standard, so that VPDB values  
173 can be converted into VSMOW applying the following formula:  $\delta^{18}\text{O}_{\text{SMOW}} =$   
174  $(1.0309 \times \delta^{18}\text{O}_{\text{VPDB}}) + 30.909$ .  $\delta^{15}\text{N}$  values are given relative to atmospheric  
175 nitrogen (AIR).

176 Bioapatite  $\delta^{13}\text{C}$  and  $\delta^{18}\text{O}$  values were measured at the *Service de*  
177 *Spectrométrie de Masse Isotopique du Muséum National Histoire Naturelle*  
178 (SSMIM-MNHN) in Paris, (France). These samples were treated following  
179 procedures described in Tornero et al. (18). Dry samples weighing ~600  
180 micrograms were introduced into a Kiel IV device interfaced to a Delta V  
181 Advantage isotope ratio mass spectrometer (IRMS). All samples were  
182 measured in two different analytical series. The accuracy and precision of the  
183 measurements were checked using an internal laboratory calcium carbonate  
184 standard (Marbre LM normalized to NBS 19). During the analysis period a total  
185 of 16 Marbre LM samples gave a mean  $\delta^{13}\text{C}$  value of  $+2.09 \pm 0.037\text{‰}$  ( $1\sigma$ )  
186 (expected value  $+2.13\text{‰}$ ) and a  $\delta^{18}\text{O}$  value of  $-1.92 \pm 0.071\text{‰}$  ( $1\sigma$ ) (expected  
187 value  $-1.83\text{‰}$ ). Bioapatite  $\delta^{13}\text{C}$  and  $\delta^{18}\text{O}$  values from SC gomphotheres were  
188 taken from González-Guarda et al. (19) and they were analysed at the Stable  
189 Isotope Laboratory of the University of California Santa Cruz (USA)  
190 Collagen extractions were performed at the Biomolecular laboratory of the  
191 Institute of Human Palaeoecology and Social Evolution (Tarragona, Spain).  
192 Collagen extraction followed original protocols proposed by Longin (20) and  
193 modified by Bocherens et al. (21). Bones fragments were cleaned mechanically  
194 to remove the surface while shards of bones (ca. 300 to 350 mg) were  
195 demineralized using 1 M HCl, rinsed with distilled water and gelatinized with  
196 0.002 M HCl at  $100^\circ\text{C}$  for 17 h. Samples were then filtered, frozen and freeze  
197 dried at the ICIQ (Institute of Chemical Research in Catalonia). Collagen  
198 samples weighting about 0.3 mg were analyzed in duplicate using a Thermo  
199 Flash 1112 elemental analyzer (EA) coupled to a Thermo Delta V Advantage  
200 isotope ratio mass spectrometer (IRMS) with a Conflo III interface, at the



201 Institute of Environmental Science and Technology, Autonomous University of  
202 Barcelona. The international laboratory standard IAEA 600 (caffeine) was used  
203 as a control. The average analytical error was  $<0.2\text{‰}$  ( $1\sigma$ ) as determined from  
204 the duplicate analyses of  $\delta^{13}\text{C}$  and  $\delta^{15}\text{N}$ . The standard used for  $\delta^{13}\text{C}$  was  
205 Vienna PeeDee Belemnite (VPDB), and the standard for  $\delta^{15}\text{N}$  was air  $\text{N}_2$  (AIR).  
206 Collagen  $\delta^{13}\text{C}$  and  $\delta^{15}\text{N}$  values from SC gomphotheres were taken from  
207 González-Guarda et al. (19) and they were analysed at the Stable Isotope  
208 Laboratory of the University of California Santa Cruz (USA).  
209 In this study, we consider a  $\delta^{13}\text{C}_{\text{atmCO}_2}$  value of  $-6.5\text{‰}$ , accepted for the late  
210 Pleistocene (22). Therefore, the ranges that we considered to classify  
211 vegetation according to  $\delta^{13}\text{C}_{\text{enamel}}$  values, after correction for trophic  
212 discrimination (23), are: 1) closed-canopy forest,  $-20.5$  to  $-14.5\text{‰}$ ; 2) woodland-  
213 mesic  $\text{C}_3$  grassland,  $-14.5$  to  $-9.5\text{‰}$ ; 3) open woodland-xeric  $\text{C}_3$  grassland,  $-9.5$   
214 to  $-6.5\text{‰}$ ; 4) mixed  $\text{C}_3\text{--C}_4$  grassland,  $-6.5\text{‰}$  to  $-1.5\text{‰}$ ; and 5) pure  $\text{C}_4$  grassland,  
215  $-1.5\text{‰}$  to  $+6.5\text{‰}$  (24).  
216 To calculate Mean Annual Temperatures (MATs), we first estimated the  $\delta^{18}\text{O}_{\text{mw}}$   
217 value ingested by gomphotheres using their enamel  $\delta^{18}\text{O}_{\text{PO}_4}$  values and then  
218 applied the  $\delta^{18}\text{O}_{\text{mw}}\text{--}\delta^{18}\text{O}_{\text{PO}_4}$  linear regression established for their nearest-living  
219 relatives: modern elephants. Such equation was selected assuming that there  
220 are no significant differences in the fractionation factor between  $\delta^{18}\text{O}_{\text{PO}_4}$  and  
221  $\delta^{18}\text{O}_{\text{mw}}$  of extinct gomphotheres and extant elephants. The equation used was  
222 the following:  $\delta^{18}\text{O}_{\text{mw}} (\text{VSMOW}) = (\delta^{18}\text{O}_{\text{PO}_4} (\text{VSMOW}) - 23.3)/0.94$  (25). To calculate  
223 the MAT, a linear equation between the MAT and  $\delta^{18}\text{O}_{\text{mw}}$  values was used:  
224  $\text{MAT} (\text{°C}) = \delta^{18}\text{O}_{\text{mw}} (\text{VSMOW}) + 12.68/0.36$  ( $R^2 = 0.72$ ) (26). This equation was  
225 chosen because it uses data from all meteorological stations around the world;

226 therefore, all existing climate regimes are represented within it. From bioapatite  
227  $\delta^{13}\text{C}$  values, modern equivalent vegetation was calculated using the following  
228 equation:  $\delta^{13}\text{C}_{\text{vegetation}} = \delta^{13}\text{C}_{\text{leaf}} + (\delta^{13}\text{C}_{\text{modernatmCO}_2} - \delta^{13}\text{C}_{\text{ancientatmCO}_2})$ , where  
229  $\delta^{13}\text{C}_{\text{leaf}} = \delta^{13}\text{C}_{\text{tooth}} - 14.1\text{‰}$  (23),  $\delta^{13}\text{C}_{\text{modernatmCO}_2}$  is  $-8\text{‰}$  and  $\delta^{13}\text{C}_{\text{ancientatmCO}_2}$  is -  
230  $6.5\text{‰}$  (late Pleistocene) (22). Mean Annual Precipitation (MAP) was calculated  
231 using the following equation:  $\delta^{13}\text{C}$  (‰, V-PDB) =  $-10.29 + 1.90 \times 10^{-4}$  Altitude  
232 (m) -  $5.61 \log_{10}$  (MAP + 300; mm/yr) -  $0.0124$  Abs (latitude, °) (27).  
233 A non-parametric Mann-Whitney U test was used to compare isotopic values of  
234 the gomphotheres from NC and SC. The significance level was set at  $p = 0.05$ .  
235  $\delta^{13}\text{C}$  will be expressed as follows:  $\delta^{13}\text{C}_{\text{bio}}$  for bioapatite samples, and  $\delta^{13}\text{C}_{\text{coll}}$  for  
236 bulk-collagen samples.

237

238 *DMA*. For this study we had access to almost all the gomphothere molars  
239 registered in Chile. Nevertheless, only 35 samples could be studied as they did  
240 not show evidences of extensive taphonomic and diagenetical alteration  
241 (Dataset). Second upper and lower molars (M2 and m2, respectively), were  
242 preferentially selected, although first (M1/m1) and third (M3/m3) molars were as  
243 well studied in order to expand the dataset (Dataset). Most of the samples  
244 showed an intermediate wear stage (28). The microwear analysis followed the  
245 methodology specified by Asevedo et al. (28): the selection of the occlusal  
246 enamel area of the metaloph/metalophid on both the postrite and pretrite cusps.  
247 The dental microwear features were analyzed using a light stereomicroscope  
248 and 35 x magnification. The cleansing, molding, casting, and examination  
249 regime was developed following to Solounias and Semprebon (10). The  
250 microwear pattern was analyzed on the occlusal area of dental enamel, and we

251 observed and quantified the following features: i) the average number of pits  
252 (rounded features) versus average number of scratches (elongated features)  
253 per taxon were assessed within a 0.16 mm<sup>2</sup> area (ocular reticle); ii) scratch  
254 textures were qualitatively scored as being either predominantly fine,  
255 predominantly coarse, or a mixture of fine and coarse types of textures per  
256 tooth surface following the criteria described in Solounias and Semprebon (10)  
257 to recognize these textures; iii) a scratch width score (SWS) was obtained by  
258 giving a score of 0 to teeth with predominantly fine scratches per tooth surface,  
259 1 to those with a mixture of fine and coarse types of textures, 2 to those with  
260 predominantly coarse scratches and 3 to those with predominantly hyper-  
261 coarse scratches per tooth surface. Individual scores for a sample were then  
262 averaged to get the average scratch width score for that taxon (29); and iv) the  
263 leaf browsers, grazers, and mixed feeders show distinctive patterns when the  
264 percentage of raw scratches in a sample that fall into a low raw scratch range  
265 are calculated (i.e., percentage of scratches that fall between 0–17). On the one  
266 hand, there is no overlap between the low-scratch ranges of extant leaf-  
267 dominated browsers and grazers (i.e., 72.73–100% of extant leaf-dominated  
268 browsing taxa have average numbers of individual scratches that fall between  
269 0–17 and 0–22.2% of extant grazing taxa have average numbers of individual  
270 scratches that fall between 0–17). On the other hand, no overlap is seen in the  
271 ranges of browsers and seasonal or regional mixed feeders (20.93–70% of taxa  
272 have average numbers of individual scratches that fall between 0–17) and the  
273 overlap between grazers and the latter it is not significant. Fruit-dominated  
274 browsers as a group exhibit a very wide range of scratch widths (0–86% of  
275 scratches fall between 0–17) perhaps reflecting differences in fruit rinds and

276 seed coats in terms of toughness and/or degree of ripeness of fruits at the time  
277 of consumption, which may also explain their broad scratch textural ranges. The  
278 degree of large pitting and puncture- like large pits may be used to distinguish  
279 fruit browsing (11).

280

281 *AMDC*. For calculus extraction, we performed a dry cleaning to remove coarse  
282 sediment and a second cleaning with acetone to remove the adhered sediment.  
283 The calculi were removed, using a dental curette to obtain small fragments. This  
284 method allowed remove sediment and minimize enamel surface damage.

285 The extraction of microfossils from the calculus samples was done using the  
286 chemical processing method described by Wesolowski et al. (30). To estimate  
287 the quantities of microfossils in dental calculus a *Lycopodium* tablet was added  
288 to each sample. A 10% solution of hydrochloric acid was added to each sample  
289 to dissolve completely the carbonates. After the calculus was dissolved, the  
290 tubes were centrifuged at 1000 RPM for 5 min and the supernatant was  
291 removed and the sample washed with distilled water and centrifuged again.

292 After the last centrifugation, the distilled water was replaced by 96% ethanol.

293 Three slides were prepared for each of the samples using Entellan®. The  
294 slides were examined under a polarized light microscope with 400x and 630x  
295 magnification. All microfossils found including: phytoliths, starch granules,

296 charcoal and *Lycopodium* spores were counted and recorded. To calculate the  
297 concentration of microfossils, we applied Maher's (31) method as modified by  
298 Wesolowski et al. (32).

299

300 *Dating.* Ten new radiocarbon dates (Table S7) are reported in this study. All of  
301 them were obtained from molar root fragments specifically selected to enhance  
302 the possibilities of isolating bone collagen. The collagen extracted was broken  
303 down into individual amino acids and purified using XAD2 resin following the  
304 methods described by Stafford et al. (33). The resultant amino acid solution was  
305 combusted and radiocarbon dated using accelerator mass spectrometry (AMS).  
306 The samples were prepared and radiocarbon dated at the Human Paleoecology  
307 and Isotope Geochemistry Lab of the Pennsylvania State University (PSUAMS),  
308 Keck Carbon Cycle AMS Facility (KCCAMS) of the University of California-  
309 Irvine, and the Center for Accelerator Mass Spectrometry CAMS in Lawrence  
310 Livermore National laboratories, California. All dates have been calibrated to  
311 calendar years using Calib 7.02 (34) and the SH-cal13 curve was applied.

312

313 *Smooth areas located in central Chile.* We calculated the Cross Sectional  
314 Curvature (CSC) from the SRTM DEM (30 m resolution). The CSC measures  
315 the surface curvature orthogonally across slope directions. We identify a  
316 threshold value of CSV equal to 0.15 between gentle and steep terrains, and  
317 we selected the smooth terrains as those where  $|CSC| \leq 0.15$ . The total area  
318 lower than 2000 m and with  $|CSC| \leq 0.15$  is 96738.06 km<sup>2</sup>.

319

320

321

322

323

324

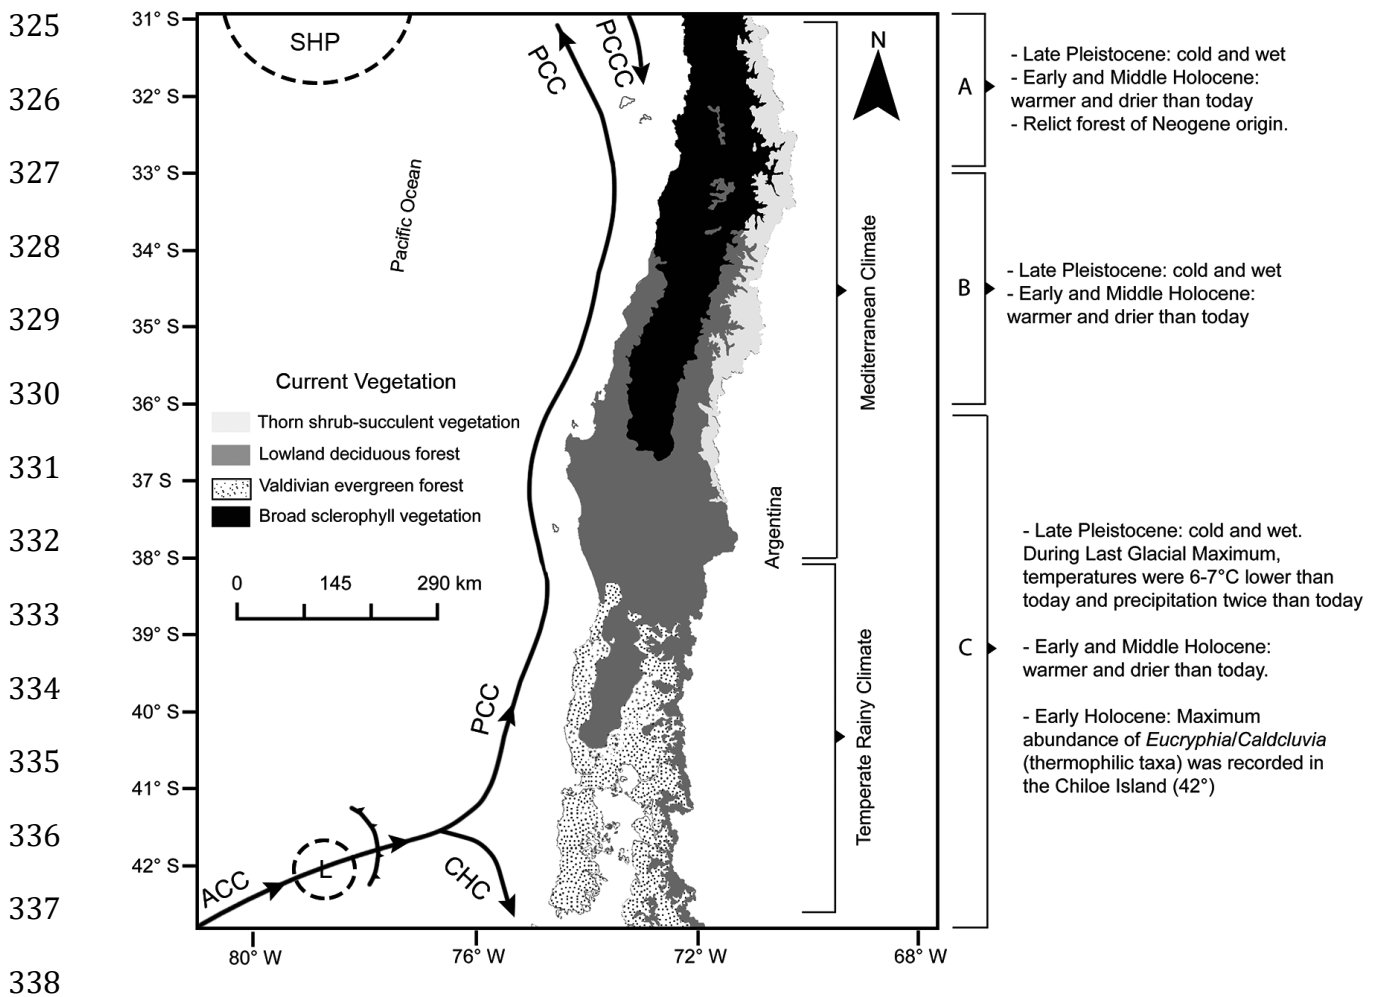

339 **Figure S1.** Climatic and vegetational situation of the study area. The vegetation  
 340 assembly of the study area is determined mainly by the presence of the Andes  
 341 Range, causing severe rain shadow effect in different areas of the continent,  
 342 isolating and singularizing the flora and vegetation of the Pacific Ocean edge of  
 343 South America, with respect to the vegetation existing to the east of the Andes  
 344 (Arid Diagonal). 31°–38°S: this area is under the influence of both the  
 345 southward flowing Peru–Chile Countercurrent (PCCC) and the northward  
 346 flowing Peru–Chile Current (PCC). The PCC, Subantarctic surface waters  
 347 originate in the northern region of the Subantarctic Front. At 30° S, the influence  
 348 of the PCC is greater during austral winter, whereas the influence of the PCCC,  
 349 bringing relatively warm waters from the low latitudes, is strong in austral

350 summer (6). In austral summer, the very stable SHP cell (subtropical high  
351 pressure) located around 30° S blocks the frontal system of the L (low-pressure  
352 belt associated with the westerlies) (generating drought; 35) (centered around  
353 49–50°S). In austral winter, the SHP is shifted northward around 30°S and the L  
354 reaches North Central Chile (6), consequently generating rains (35). 38°–43°S:  
355 this study area is located at the northern margin of the Antarctic Circumpolar  
356 Current (ACC) under the influence of subantarctic surface waters and steep  
357 latitudinal SST Surface Sea Temperature (SST). The northern part of the ACC  
358 splits around 43°S into the PCC flowing northward and the Cape Horn Current  
359 (CHC) turning toward the south. In summer, the storm track activity (associated  
360 to the westerlies in the Southern Hemisphere) can be as strong as in winter, but  
361 is located slightly equatorward of its winter position, and is concentrated in a  
362 tight band centered around 49°–50°S. In winter, storm track activity extends  
363 over a broader range of latitudes and is centered only 2° poleward from its  
364 summer position. The strong SST gradients associated with the ACC are  
365 marked by a northward latitudinal shift of ~5° in Winter (4).

366

367

368

369

370

371

372

373

374





400 shade-tolerant conifer) and wet/dry anomalies in precipitation. AO and BO,  
401 abrupt expansion of thermophilous, closed canopy North Patagonian rainforest.  
402 ACR, increase in the number of cold resistant hygrophilous trees and a decline  
403 in thermophilic taxa (North Patagonian rainforest). OD, increase of the cold-  
404 resistance *Podocarpus nubigena*. HE1: abrupt increase in thermophyllic  
405 vegetation assemblages. LGM, increase in cold-resistant hygrophilous herbs  
406 and Moorland Magellanic communities. Among 24–33 cal yr BP, the X axis is  
407 abbreviated.

408

409

410

411

412

413

414

415

416

417

418

419

420

421

422

423

424

425

426

427

428

429

430

431

432

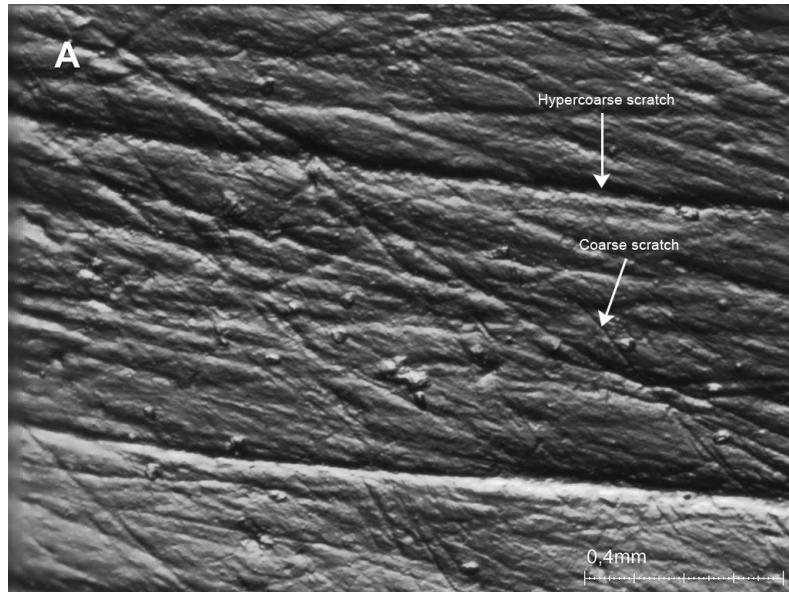

433

434

435

436

437

438

439

440

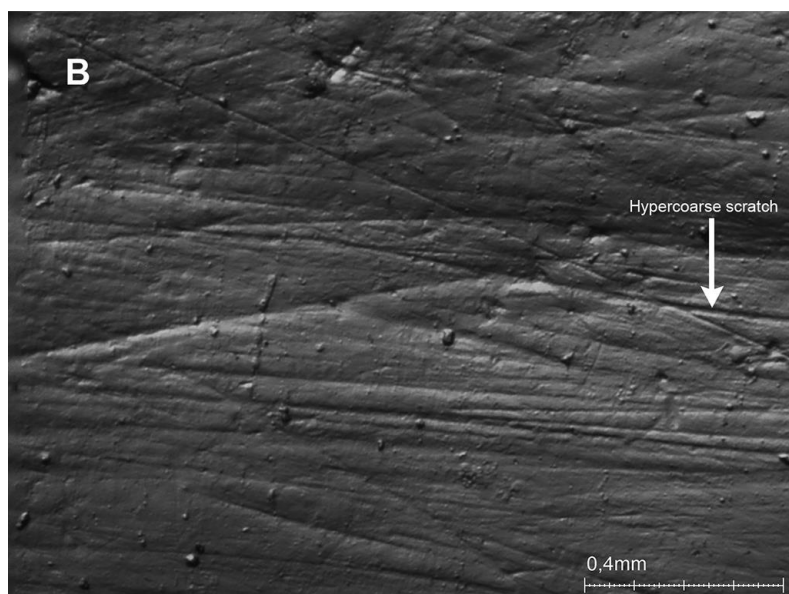

441

442

443

444

445

446

447

448

449

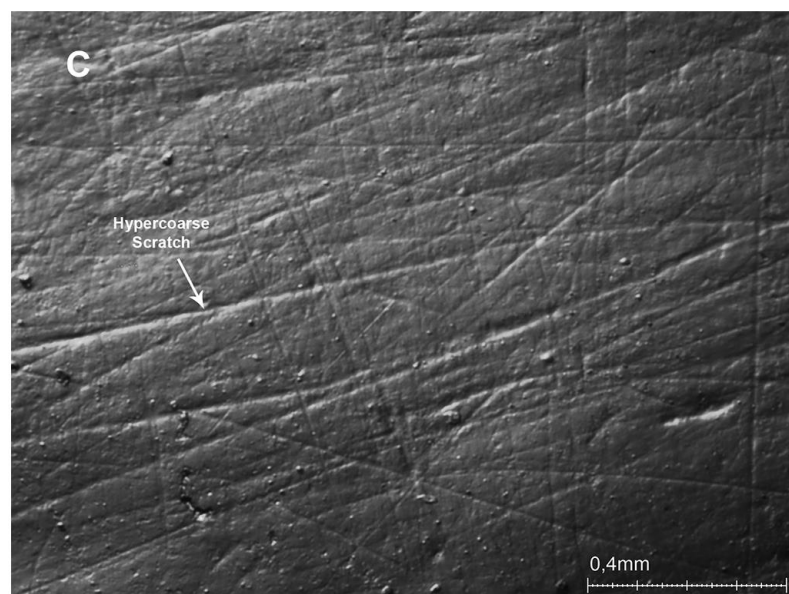

450

451 **Figure S3.** Photomicrographs of tooth enamel surface from selected Chilean  
452 fossil gomphotheres, at 35 times magnification. **A)** Gomphothere from  
453 Lagunillas site (SGO.PV.22) (33°S; North–Central). **B)** Gomphothere from  
454 Tagua Tagua site (SGO.PV.47c) (34°S; North–Central). **C)** Gomphothere from  
455 Alto de Boroa site (MRA2462) (38°S; South–Central).

456

457

458

459

460

461

462

463

464

465

466

467

468

469

470

471

472

473

474

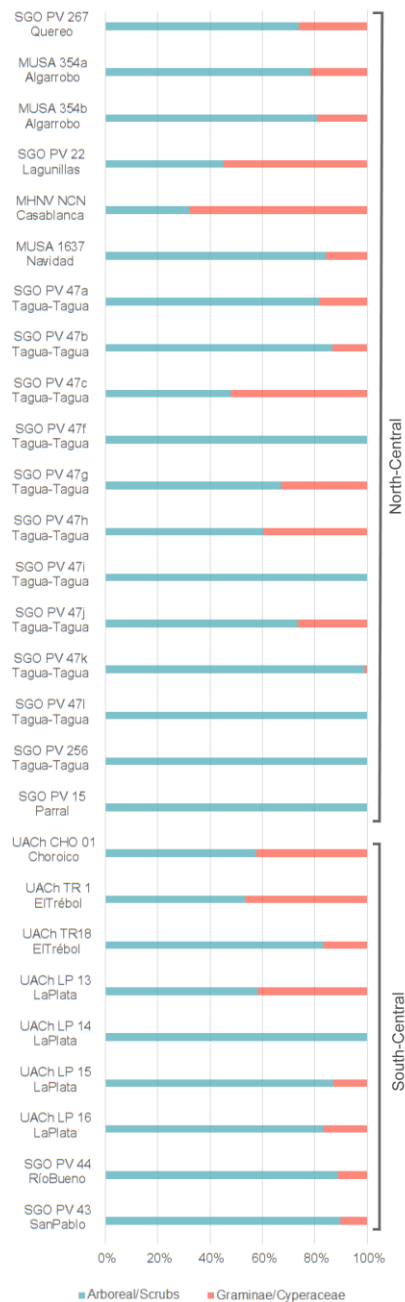

475 **Figure S4.** Percentages between arboreal/scrubs elements (light blue) and  
 476 non-arboreal elements (Graminae/Cyperaceae) (red) based on dental calculus  
 477 analysis of selected Chilean gomphotheres.

478

479

480

481

482

483

484

485

486

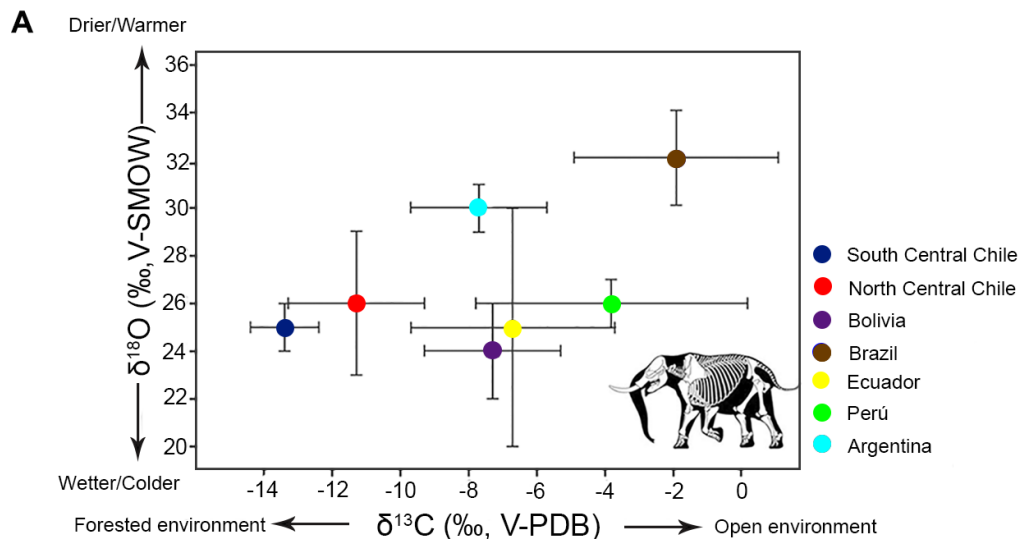

487

488

489

490

491

492

493

494

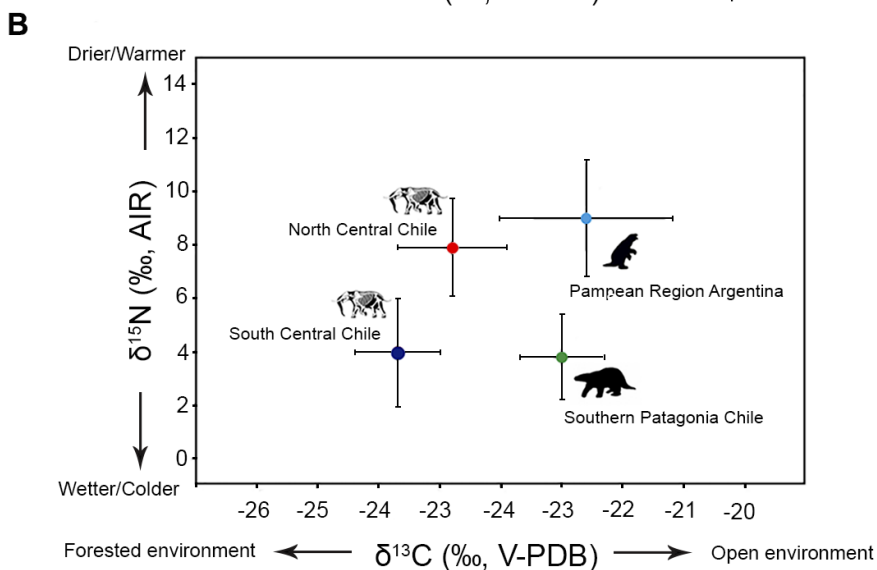

495 **Figure S5. A)** Bioapatite mean  $\delta^{13}\text{C}$  (‰, VPDB) and  $\delta^{18}\text{O}_{\text{CO}_3}$  (‰, VSMOW)  
 496 values  $\pm 1$  standard deviation of *Notiomastodon platensis* from Chile. Isotopic  
 497 results from other contemporaneous sites of South America are shown (24, 36).  
 498 It is noticeable the low bioapatite  $\delta^{13}\text{C}$  values depicted by Chilean  
 499 gomphotheres when compared to specimens (*Notiomastodon platensis* and

500 *Cuvieronius hyodon*) from other South America localities. **B)** Collagen mean  
 501  $\delta^{13}\text{C}$  (‰, VPDB) and  $\delta^{15}\text{N}$  (‰, AIR) values  $\pm 1$  standard deviation of  
 502 gomphotheres from Chile. It is remarkable the latitudinal gradient recorded by  
 503 collagen  $\delta^{15}\text{N}$  values between gomphotheres from the North–Central and  
 504 South-Central areas. Mean  $\delta^{13}\text{C}$  and  $\delta^{15}\text{N}$  values of herbivores from the  
 505 Pampean Region (37) and Southern Patagonia (38) are included in the figure.

506

507 **Table S1.** Summary of stable isotope data and statistical tests. **A.** Bioapatite  
 508  $\delta^{13}\text{C}$  (‰, VPDB) values, **B.** Bioapatite  $\delta^{18}\text{O}_{\text{CO}_3}$  (‰, VPDB) values, **C.** Collagen  
 509  $\delta^{13}\text{C}$  (‰, VPDB) values, **D.** Collagen  $\delta^{15}\text{N}$  (‰, AIR) values. In the case of  
 510 bioapatite, stable isotope values of our study were analyzed together with  
 511 values from Sánchez et al. (39), Domingo et al. (24), and González-Guarda et  
 512 al. (19). In the case of collagen, stable isotope values of our study were  
 513 analyzed together with values from González-Guarda et al. (19).

514

| A. $\delta^{13}\text{C}$ (‰, VPDB) <sub>(bioapatite)</sub>               |                           |       |         |       |                    |
|--------------------------------------------------------------------------|---------------------------|-------|---------|-------|--------------------|
| Area                                                                     | n                         | Min   | Max     | Mean  | Standard deviation |
| North–Central                                                            | 38                        | -14.8 | -3.9    | -11.3 | 2.2                |
| South–Central                                                            | 23                        | -15.2 | -11.7   | -13.4 | 0.8                |
| Mean Rank (North–Central)                                                | Mean Rank (South–Central) | z     | p-value |       |                    |
| 24.7                                                                     | 6.7                       | -4.8  | 0.0001  |       |                    |
| B. $\delta^{18}\text{O}_{\text{CO}_3}$ (‰, VPDB) <sub>(bioapatite)</sub> |                           |       |         |       |                    |
| Area                                                                     | n                         | Min   | Max     | Mean  | Standard deviation |
| North–Central                                                            | 38                        | -12.4 | 0.6     | -4.3  | 2.5                |
| South–Central                                                            | 23                        | -7.1  | -2.4    | -5.1  | 0.9                |

| Mean Rank<br>(North–<br>Central)                                        | Mean Rank<br>(South–<br>Central) | z     | p-value |       |                        |
|-------------------------------------------------------------------------|----------------------------------|-------|---------|-------|------------------------|
| 22.4                                                                    | 9                                | -2.7  | 0.005   |       |                        |
| <b>C. <math>\delta^{13}\text{C}</math> (‰, VPDB)<sub>collagen</sub></b> |                                  |       |         |       |                        |
| Area                                                                    | n                                | Min   | Max     | Mean  | Standard<br>desviation |
| North–<br>Central                                                       | 13                               | -22.7 | -19.2   | -21.8 | 0.9                    |
| South–<br>Central                                                       | 21                               | -23.9 | -21.4   | -22.7 | 0.7                    |
| Mean Rank<br>(North–<br>Central)                                        | Mean Rank<br>(South–<br>Central) | z     | p-value |       |                        |
| 9                                                                       | 8.4                              | -2.8  | 0.0045  |       |                        |
| <b>D. <math>\delta^{15}\text{N}</math> (‰, AIR)<sub>collagen</sub></b>  |                                  |       |         |       |                        |
| Area                                                                    | n                                | Min   | Max     | Mean  | Standard<br>desviation |
| North–<br>Central                                                       | 13                               | 7.1   | 14.2    | 7.9   | 1.8                    |
| South–<br>Central                                                       | 21                               | 1.3   | 8.5     | 4     | 2.1                    |
| Mean Rank<br>(North–<br>Central)                                        | Mean Rank<br>(South–<br>Central) | z     | p-value |       |                        |
| 10.3                                                                    | 7.1                              | -4.3  | 0.0001  |       |                        |

515

516

517

518

519

520

521

522

523

524 **Table S2.** Summary and statistical tests for the modern equivalent dietary (i.e.,  
525 vegetation) carbon stable isotope value ( $\delta^{13}\text{C}_{\text{diet,meq}}$ ) calculated for NC and SC  
526 gomphotheres. From bioapatite  $\delta^{13}\text{C}$  values, modern equivalent vegetation was  
527 calculated using the following equation:  $\delta^{13}\text{C}_{\text{diet,meq}} = \delta^{13}\text{C}_{\text{leaf}} + (\delta^{13}\text{C}_{\text{modernatmCO}_2} -$   
528  $\delta^{13}\text{C}_{\text{ancientatmCO}_2})$ , where  $\delta^{13}\text{C}_{\text{leaf}} = \delta^{13}\text{C}_{\text{tooth}} - 14.1\text{‰}$ ,  $\delta^{13}\text{C}_{\text{modernatmCO}_2}$  is  $-8\text{‰}$  and  
529  $\delta^{13}\text{C}_{\text{ancientatmCO}_2}$  is  $-6.5\text{‰}$  (late Pleistocene).

530

| Area                      | n                         | Min | Max     | Mean  | Standard desviation |
|---------------------------|---------------------------|-----|---------|-------|---------------------|
| North–Central             | 38                        | -31 | -20     | -26.9 | 2.2                 |
| South–Central             | 24                        | -31 | -27     | -29   | 0.8                 |
| Mean Rank (North–Central) | Mean Rank (South–Central) | z   | p-value |       |                     |
| 24.8                      | 6.6                       | -5  | 0.0001  |       |                     |

531

532

533

534

535

536

537

538

539

540

541

542

543 **Table S3.** Summary and statistical tests for mean annual temperatures (MATs)  
 544 calculated for NC and SC areas from gomphothere  $\delta^{18}\text{O}_{\text{PO4}}$  values.  
 545 To calculate meteoric water  $\delta^{18}\text{O}$  values ( $\delta^{18}\text{O}_{\text{mw}}$ ) from gomphothere tooth  
 546 enamel  $\delta^{18}\text{O}_{\text{PO4}}$  values, the following equation was used:  $\delta^{18}\text{O}_{\text{mw (VSMOW)}} =$   
 547  $(\delta^{18}\text{O}_{\text{PO4 (VSMOW)}} - 23.3)/0.94$ . Subsequently, MAT was estimated using the linear  
 548 regression established between MAT and  $\delta^{18}\text{O}_{\text{mw}}$  values:  $\text{MAT (}^\circ\text{C)} = \delta^{18}\text{O}_{\text{mw}}$   
 549  $(\text{VSMOW}) + 12.68)/0.36$  ( $R^2 = 0.72$ ).  
 550

| Area                      | n                         | Min °C | Max °C  | Mean °C | Standard deviation |
|---------------------------|---------------------------|--------|---------|---------|--------------------|
| North-Central             | 38                        | -6     | 30      | 18.6    | 7                  |
| South-Central             | 25                        | 9      | 23      | 15.6    | 2.6                |
| Mean Rank (North-Central) | Mean Rank (South-Central) | z      | p-value |         |                    |
| 23.2                      | 8.7                       | -3.5   | 0.0005  |         |                    |

551  
 552  
 553  
 554  
 555  
 556  
 557  
 558  
 559  
 560  
 561



562 **Table S4.** Raw data from stereoscopic microwear analysis for *Notiomastodon*  
563 *platensis* from central Chile. SP = small pits; LP = large pits; FS = fine  
564 scratches; CS = coarse scratches. A scratch width score (SWS) was obtained  
565 by giving a score of 0 to teeth with predominantly fine (F) scratches per tooth  
566 surface, 1 to those with a mixture (Mx) of fine and coarse types of textures, 2 to  
567 those with predominantly coarse scratches per tooth surface (C) and a score of  
568 3 to teeth with predominantly hyper-coarse (HC) per tooth surface. HC  
569 (ausence/presence) = 0 to ausence; and 1 to presence.  
570

| Sample             | Tooth  | Site/Latitude     | Number of pits |    | Number of Scratches |    | SWS |    |   |    | FS + CS | HC (ausence/presence) |
|--------------------|--------|-------------------|----------------|----|---------------------|----|-----|----|---|----|---------|-----------------------|
|                    |        |                   | SP             | LP | FS                  | CS | F   | Mx | C | HC |         |                       |
| SGO.PV. 267        | M3     | Quereo, 31°S      | 18             |    | 4                   | 6  |     |    | 2 |    | 10      | 0                     |
| SGO.PV. 22         | M3     | Lagunillas, 33°S  | 3              |    |                     | 3  |     |    |   | 3  | 3       | 1                     |
| SGO.PV. MUSA035 4a | Indet. | Algarrobo, 33°S   | 15             |    | 8                   | 4  |     | 1  |   |    | 12      | 0                     |
| MUSA169 0          | M3     | Río Rapel, 33°S   | 2              |    | 6                   | 3  |     | 1  |   |    | 9       | 0                     |
| MHNV (ncn)         | M2/m2  | Casablanca, 33°S  | 4              |    | 11                  | 3  |     | 1  |   |    | 14      | 1                     |
| SGO.PV. 47h        | M2/m2  | Tagua Tagua, 34°S | 2              |    | 5                   | 7  |     |    | 2 |    | 12      | 1                     |
| SGO PV.1E          | M3     | Tagua Tagua, 34°S | 3              | 12 | 6                   | 4  |     |    | 2 |    | 10      | 0                     |
| SGO PV 47i         | M3/m3  | Tagua Tagua, 34°S | 4              |    | 2                   | 7  |     |    | 2 |    | 9       | 1                     |
| SGO.PV. 47a        | M3/m3  | Tagua Tagua, 34°S | 2              |    |                     | 4  |     |    | 2 |    | 4       | 1                     |
| SGO.PV. 47b        | M3/m3  | Tagua Tagua, 34°S | 2              |    | 13                  |    |     | 1  |   |    | 13      | 0                     |
| SGO.PV. 47j        | M3     | Tagua Tagua, 34°S | 5              |    | 11                  | 1  |     | 1  |   |    | 12      | 0                     |
| SGO.PV. 13a        | M3     | Tagua Tagua, 34°S | 3              |    | 7                   | 6  |     |    | 2 |    | 13      | 1                     |
| SGO.PV. 47c        | M3/m3  | Tagua Tagua, 34°S | 6              |    | 17                  | 2  |     | 1  |   |    | 19      | 1                     |

|                  |        |                        |    |    |    |    |  |   |   |    |   |
|------------------|--------|------------------------|----|----|----|----|--|---|---|----|---|
| SGO.PV.<br>46a   | M3/m3  | Tagua Tagua,<br>34°S   | 5  |    | 13 | 3  |  | 1 |   | 16 | 1 |
| SGO.PV.<br>46b   | M3/m3  | Tagua Tagua,<br>34°S   | 2  |    | 5  | 5  |  | 1 |   | 10 | 1 |
| SGO.PV.<br>47f   | M3/m3  | Tagua Tagua,<br>34°S   | 3  |    | 4  | 5  |  |   | 2 | 9  | 1 |
| SGO.PV.<br>47k   | M2/m2  | Tagua Tagua,<br>34°S   | 4  |    | 3  | 4  |  |   | 2 | 7  | 1 |
| SGO.PV.<br>48a   | M1/m1  | Tagua Tagua,<br>34°S   | 3  |    |    | 10 |  |   | 2 | 10 | 0 |
| SGO.PV.<br>256   | M3/m3  | Tagua Tagua,<br>34°S   | 5  |    | 6  | 5  |  |   | 2 | 11 | 1 |
| SGO.PV.<br>47l   | M3/m3  | Tagua Tagua,<br>34°S   | 2  | 17 | 1  | 4  |  |   | 2 | 5  | 1 |
| SGO.PV.<br>55    | M3/m3  | Parral, 36°S           | 3  |    | 9  | 3  |  |   | 2 | 12 | 1 |
| SGO.PV.<br>15a   | M3/m3  | Parral, 36°S           | 2  | 4  |    | 4  |  |   | 2 | 4  | 1 |
| SGO.PV.<br>15b   | M3/m3  | Parral, 36°S           | 3  |    | 4  | 2  |  |   | 2 | 6  | 0 |
| MRA2462          | M3     | Alto de Boroa,<br>38°S | 2  |    | 8  | 4  |  |   | 2 | 12 | 1 |
| MRA2461          | M3     | Alto de Boroa,<br>38°S | 3  |    | 7  | 5  |  |   | 2 | 12 | 1 |
| UACH PV<br>MA 1  | m2     | Máfil, 39°S            | 4  | 6  |    | 4  |  |   | 2 | 4  | 1 |
| UACH PV<br>LP 13 | m2     | La Plata, 40°S         | 2  | 7  | 3  | 6  |  |   | 2 | 9  | 0 |
| MHMOP/<br>MU/3B  | Indet. | Mulpulmo,<br>40°S      | 3  | 9  | 4  | 5  |  |   | 2 | 9  | 1 |
| MHMOP/<br>MU/5   | M2/m2  | Mulpulmo,<br>40°S      | 3  |    | 6  | 8  |  |   | 2 | 14 | 1 |
| MHMOPI/<br>628   | M2     | Pilauco, 40°S          | 3  |    | 4  | 5  |  |   | 2 | 9  | 1 |
| MHMOPI/<br>627   | M2     | Pilauco, 40°S          | 4  |    | 4  | 5  |  |   | 2 | 9  | 1 |
| UACH PV<br>FR 22 | Indet. | Frutillar, 41°S        | 4  |    | 1  | 3  |  |   |   | 3  | 4 |
| MHAMM<br>A02156  | m3     | Monte Verde,<br>41°S   | 2  | 3  |    | 6  |  |   | 2 | 6  | 1 |
| MMC 5            | M3     | Castro, 42°S           | 5  |    | 4  | 4  |  |   | 2 | 8  | 1 |
| MMC 6            | m3     | Castro, 42°S           | 15 |    | 3  | 3  |  |   | 2 | 6  | 1 |

571

572 Institutions: SGO.PV, Museo Nacional de Historia Natural; MRA, Museo Regional de la

573 Araucanía; UACH PV, Universidad Austral de Chile Paleontología de Vertebrados; MHMO,

574 Museo Histórico Municipal de Osorno; MMC, Museo Municipal de Castro; MUSA, Museo de

575 Historia Natural de Valparaíso; MHAMM, Museo Histórico y Antropológico Mauricio Van de  
 576 Maele.

577

578 **Tabla S5.** Microwear results for fossil gomphotheres grouped latitudinally.

579 Abbreviations: TNL = total number of localities; N = sample size; Np= average  
 580 number of pits; SDNp = standard deviation of the average number of pits; Ns =  
 581 average number of scratches; SDNs = standard deviation of the average  
 582 number of scratches; %LP = percentage of individuals with large pits; SWS =  
 583 scratch width score; %HC = percentage of individuals with hypercoarse  
 584 scratches; %0–17 = percentage of individuals with low numbers of scratches  
 585 (from 0 to 17 scratches per counting area).

586

| Latitude                                 | TNL | N  | Np  | SDNp | Ns  | SDNs | %LP | SWS | %HC | %0-17 |
|------------------------------------------|-----|----|-----|------|-----|------|-----|-----|-----|-------|
| <b>31°–36°S<br/>(North–<br/>Central)</b> | 7   | 23 | 4.3 | 4    | 10  | 4    | 14  | 1.8 | 68  | 95    |
| <b>38°–42°S<br/>(South–<br/>Central)</b> | 8   | 12 | 4.1 | 3.5  | 8.5 | 3    | 33  | 2   | 92  | 100   |

587

588 **Table S6.** Percentages of arboreal/scrubs/herbs phytoliths; Number of  
 589 diatoms/sponge spicules; Microfossils concentration.

590

| Localities and latitude | Sample     | Tooth  | % Arboreal | % Scrubs | % Herbs | % Cyperacea | N° Diatoms/spicules |
|-------------------------|------------|--------|------------|----------|---------|-------------|---------------------|
| Quereo, 31°S            | SGO PV 267 | m3     | 96.6       |          | 3.4     | 0           | 0                   |
| Illapel, 31°S           | SGO PV 40  | M2     | 100        |          | 0       | 0           | 1                   |
| Lagunillas, 33°S        | SGO PV 22  | M3     | 45         | 0        | 41      | 14          | 3                   |
| Algarrobo, 33°S         | MUSA354a   | Indet. | 75.5       | 3        | 21      | 0           | 1                   |
| Algarrobo, 33°S         | MUSA354b   | Indet. | 76         | 5        | 19      | 0           | 0                   |
| Navidad, 33°S           | MUSA1637   | M3/m3  | 84         | 0        | 16      | 0           | 0                   |
| Casablanca, 33°S        | MNHV (ncn) | M2/m2  | 25         | 7        | 68      | 0           | 107                 |

|                                   |               |       |      |      |      |     |     |
|-----------------------------------|---------------|-------|------|------|------|-----|-----|
| Tagua –<br>Tagua,<br>34°S         | SGO PV 47a    | M3    | 81.8 |      | 16.8 | 1.4 | 4   |
|                                   | SGO PV 47b    | M3/m3 | 67.6 | 20   | 13.4 | 0   | 2   |
|                                   | SGO PV 47c    | M3/m3 | 26   | 22   | 32   | 20  | 240 |
|                                   | SGO PV 47f    | M3/m3 | 100  |      | 0    | 0   | 0   |
|                                   | SGO PV 47g    | M3/m3 | 67.7 |      | 33.3 | 0   | 0   |
|                                   | SGO PV 47h    | M2/m2 | 92.6 | 0.22 | 6.2  | 0   | 0   |
|                                   | SGO PV 47i    | M3/m3 | 100  |      | 0    | 0   | 0   |
|                                   | SGO PV 47j    | M3    | 73.5 |      | 24.5 | 2.5 | 28  |
|                                   | SGO PV 47k    | M2/m2 | 90.7 | 1.33 | 8    | 0   | 14  |
|                                   | SGO PV 47l    | M3/m3 | 98.4 | 1.6  | 0    | 0   | 0   |
|                                   | SGO PV 256    | M3/m3 | 100  |      | 0    | 0   | 0   |
| Parral,<br>36°S                   | SGO PV 15a    | M3/m3 | 80.9 | 4.8  | 14.3 | 0   | 0   |
| El Trébol,<br>39°S                | UACH PV TR 1  | m3    | 48.7 | 4.7  | 46.6 | 0   | 0   |
|                                   | UACH PV TR 18 | m3    | 82.6 |      | 17.4 | 0   | 0   |
| Choroico,<br>40°S                 | UACHPVCHO01   | M3    | 53   | 4.1  | 42.1 | 0   | 2   |
| San Pablo de<br>Tramalué,<br>40°S | SGO PV 43     | M3    | 86.2 | 3.6  | 10.2 | 0   | 1   |
| La Plata,<br>Futroneo,<br>40°S    | UACH PV LP 13 | m2    | 79.9 | 13.4 | 6.7  | 0   | 0   |
|                                   | UACH PV LP 14 | m2    | 63.3 | 36.7 | 0    | 0   | 0   |
|                                   | UACH PV LP 15 | m2    | 84.8 | 2.2  | 13   | 0   | 0   |
|                                   | UACH PV LP 16 | m2    | 83.4 |      | 16.6 | 0   | 0   |
| Rio Bueno,<br>40°S                | SGO PV 44     | M3    | 83.2 | 5.8  | 11   | 0   | 0   |

591

592 **Table S7.** Radiocarbon dates on Gomphotheriidae obtained from bone collagen  
593 and using AMS. All dates have been calibrated to calendar years using the  
594 software Calib 7.0.4 and the Southern Hemisphere calibration curve SH13. Two  
595 different pretreatments of bone collagen were used: <sup>a</sup> XAD, <sup>b</sup> Ultrafiltration.

596

| Taxon                          | Collection number | Locality      | <sup>14</sup> C Lab number | Anatomical Element   | <sup>14</sup> C age | Cal mean (cal yr BP) | Cal 2σ range (cal yr BP) | Reference                    |
|--------------------------------|-------------------|---------------|----------------------------|----------------------|---------------------|----------------------|--------------------------|------------------------------|
| <i>Notiomastodon platensis</i> | SGO.PV.267        | Quereo        | CAMS 175732 <sup>a</sup>   | Molar root, collagen | 10970 ± 70          | 12799                | 12703-12982              | This study                   |
| <i>Notiomastodon platensis</i> | SGO.PV.256        | Tagua Tagua   | PSUAMS 2429 <sup>a</sup>   | Molar root, collagen | 11750 ± 60          | 13527                | 13424-13717              | This study                   |
| <i>Notiomastodon platensis</i> | SGO.PV.47k        | Tagua Tagua   | CAMS 175743 <sup>a</sup>   | Molar root, collagen | 12260 ± 80          | 14123                | 13805-14524              | This study                   |
| <i>Notiomastodon platensis</i> | MRA2462           | Alto de Boroa | PSUAMS 2430 <sup>a</sup>   | Molar root, collagen | 11875 ± 50          | 13655                | 13545-13770              | This study                   |
| <i>Notiomastodon platensis</i> | UACH PV MA 1      | Máfil         | CAMS 175749 <sup>a</sup>   | Molar root, collagen | 11790 ± 80          | 13575                | 13434-13751              | Gonzalez-Guarda et al., 2017 |
| <i>Notiomastodon platensis</i> | GEOUACH/P/80      | El Trébol     | UCI 101833 <sup>b</sup>    | Molar root           | 28760 ± 390         | 32752                | 31657-33661              | Gonzalez-Guarda et al., 2017 |
| <i>Notiomastodon platensis</i> | UACH PV CHA 01    | Chan Chan     | PSUAMS 2423 <sup>a</sup>   | Molar, collagen      | 10250 ± 45          | 11890                | 11745-12050              | This study                   |
| <i>Notiomastodon platensis</i> | UACH PV CHO 01    | Choroico      | PSUAMS 2422 <sup>a</sup>   | Molar, collagen      | 11345 ± 45          | 13154                | 13070-13264              | This study                   |
| <i>Notiomastodon platensis</i> | GEOUACH 81        | La Plata      | UCI 102088 <sup>b</sup>    | Molar root           | 12315 ± 40          | 14185                | 14021-14463              | Gonzalez-Guarda et al., 2017 |
| <i>Notiomastodon platensis</i> | SGO.PV.44         | Rio Bueno     | CAMS 175733 <sup>a</sup>   | Molar root, collagen | 11090 ± 70          | 12910                | 12747-13062              | Gonzalez-Guarda et al., 2017 |

|                                |             |                |                          |                      |             |        |               |                              |
|--------------------------------|-------------|----------------|--------------------------|----------------------|-------------|--------|---------------|------------------------------|
| <i>Notiomastodon platensis</i> | SGO.PV.43   | San Pablo      | CAMS 175744 <sup>a</sup> | Molar root, collagen | 11380 ± 70  | 13188  | 13064-13317   | Gonzalez-Guarda et al., 2017 |
| <i>Notiomastodon platensis</i> | indet.      | Mulpulmo       | PSUAMS 2425 <sup>a</sup> | Molar, collagen      | 19550 ± 130 | 23499  | 19550-23086   | This study                   |
| <i>Notiomastodon platensis</i> | indet.      | Nochaco        | PSUAMS 2424 <sup>a</sup> | Molar root, collagen | 17130 ± 90  | 20612  | 17130-20339   | This study                   |
| <i>Notiomastodon platensis</i> | MHMOPI/628  | Pilauco        | PSUAMS 2415 <sup>a</sup> | Molar root, collagen | 13240 ± 60  | 15861  | 13240-15644   | This study                   |
| <i>Notiomastodon platensis</i> | GEOUACH 132 | Los Notros     | AA 109501                | Tusk                 | 13,585± 81  | 16,310 | 16,048-16,614 | This study                   |
| <i>Notiomastodon platensis</i> | MMC 5       | Castro, Chiloé | PSUAMS 2426 <sup>a</sup> | Molar root, collagen | 13270 ± 60  | 15900  | 13270-15685   | This study                   |

597

598 Institutions: SGO.PV, Museo Nacional de Historia Natural; MRA, Museo Regional de la  
599 Araucanía; UACH PV, Universidad Austral de Chile, Paleontología de Vertebrados; MHMO,  
600 Museo Histórico Municipal de Osorno; MMC, Museo Municipal de Castro; GEOUACH, Geología  
601 Universidad Austral de Chile; CAMS, center for accelerator mass spectrometry in Lawrence  
602 Livermore National laboratories, California; PSUAMS, Human Paleoecology and Isotope  
603 Geochemistry Lab of the Pennsylvania State University; UCI, Keck Carbon Cycle AMS Facility,  
604 Earth System Science Dept, Univ. California – Irvine; AA, NSF Arizona AMS Laboratory.

605

## 606 **References**

607

- 608 1. Berman A-L, Silvestri G-E, Tonello M-S (2016) Differences between Last  
609 Glacial Maximum and present-day temperature and precipitation in southern  
610 South America. *Quat Sci Rev* 150, 221–233.
- 611 2. Moreno P, et al. (2015). Radiocarbon chronology of the last glacial maximum  
612 and its termination in northwestern Patagonia. *Quat Sci Rev* 122, 233–249.
- 613 3. Mathiasen P, Premoli, A-C (2010) Out in the cold: genetic variation of  
614 *Nothofagus pumilio* (Nothofagaceae) provides evidence for latitudinally distinct  
615 evolutionary histories in austral South America. *Mol Ecol* 19(2): 371–385.
- 616 4. Lamy F, et al. (2007) Modulation of the bipolar seesaw in the southeast  
617 Pacific during termination 1. *Earth Planet Sci Lett* 259, 400–413.

- 618 5. Valero-Garcés, B-L et al. (2005). Palaeohydrology of Laguna de Tagua  
619 Tagua (34°30' S) and Moisture Fluctuations in Central Chile for the Last 46,000  
620 yr, *J Quat Sci* 20 (7-8), 625–641.
- 621 6. Kaiser J, Schefuß E, Lamy F, Mohtadi M, Hebbeln D (2008) Glacial to  
622 Holocene changes in sea surface temperature and coastal vegetation in north  
623 central Chile: high versus low latitude forcing. *Quat Sci Rev* 27(21): 2064–2075.
- 624 7. Iacumin P, Bocherens H, Mariotti A, Mariotti A, Longinelli A (1996) Oxygen  
625 isotope analyses of coexisting carbonate and phosphate in biogenic apatite: a  
626 way to monitor diagenetic alteration of bone phosphate? *Earth Planet Sci Lett*  
627 142, 1–6.
- 628 8. Clementz M-T, Fox-Dobbs K, Wheatley P-V, Koch, P-L, Doak D-F (2009)  
629 Revisiting old bones: coupled carbon isotope analysis of bioapatite and  
630 collagen as an ecological and palaeoecological tool. *Geol J* 44(5): 605–620.
- 631 9. Ambrose S-H, (1990). Preparation and characterization of bone and tooth  
632 collagen for isotopic analysis. *J Archaeol Sci* 17, 431–451.
- 633 10. Solounias N, Semprebon G (2002) Advances in the reconstruction of  
634 ungulate ecomorphology with application to early fossil equids. *Am Mus Novit*  
635 1–49.
- 636 11. Semprebon G-M, Rivals F, Solounias N, Hulbert R-C (2016) Paleodietary  
637 reconstruction of fossil horses from the Eocene through Pleistocene of North  
638 America. *Palaeogeogr Palaeoclimatol Palaeoecol* 442, 110–127.
- 639 12. Alvin K-L, Fraser C-J, Spicer R-A (1981) Anatomy and palaeoecology of  
640 *Pseudofrenelopsis* and associated conifers in the English Wealden.  
641 *Paleontology* 24, 759–778.

- 642 13. Grine F-E, 1986. Dental evidence for dietary differences in *Australopithecus*  
643 and *Paranthropus*: a quantitative analysis of permanent molar microwear. *J.*  
644 *Hum Evol* 15, 783–822.
- 645 14. Cordova C-E, Avery G (2017) African savanna elephants and their  
646 vegetation associations in the Cape Region, South Africa: Opal phytoliths from  
647 dental calculus on prehistoric, historic and reserve elephants. *Quat Int* 443:  
648 189–211.
- 649 15. Weyrich L-S, et al. (2017) Neanderthal behaviour, diet, and disease inferred  
650 from ancient DNA in dental calculus. *Nature* 544, 357–361.
- 651 16. Power R-C, et al. (2015) Dental calculus evidence of Tai Forest  
652 Chimpanzee plant consumption and life history transitions *Scientific Reports*,  
653 *Sci Rep* 5, 15161.
- 654 17. Weber S, Price M (2016) What the pig ate: A microbotanical study of pig  
655 dental calculus from 10th–3rd millennium BC northern Mesopotamia, *J Archaeol*  
656 *Sci* 6, 819–827.
- 657 18. Tornero C, et al. (2013) Seasonality and season of birth in early Eneolithic  
658 sheep from Cheia (Romania): methodological advances and implications for  
659 animal economy. *J Archaeol Sci* 40, 4039–4055.
- 660 19. González-Guarda E, et al. (2017) Late Pleistocene ecological,  
661 environmental and climatic reconstruction based on megafauna stable isotopes  
662 from northwestern Chilean Patagonia. *Quat Sci Rev* 170, 188–202.
- 663 20. Longin R (1971) New method of collagen extraction for radiocarbon  
664 dating. *Nature* 230(5291): 241–242.

- 665 21. Bocherens H, et al. (1991). Biogéochimie isotopique ( $^{13}\text{C}$ ,  $^{15}\text{N}$ ,  $^{18}\text{O}$ ) et  
666 paléoécologie des ours pléistocènes de la grotte d'Aldène. *Bull Mus Anthropol*  
667 *Prehist Monaco*, 34: 29–49.
- 668 22. Tipple B-J, Meyers S-R, Pagani M (2010) Carbon isotope ratio of cenozoic  
669  $\text{CO}_2$ : a comparative evaluation of available geochemical proxies.  
670 *Paleoceanography* 25(3).
- 671 23. Cerling T-E, Harris J-M (1999) Carbon isotope fractionation between diet  
672 and bioapatite in ungulate mammals and implications for ecological and  
673 paleoecological studies. *Oecologia* 120(3): 347–363.
- 674 24. Domingo L, Prado J-L, Alberdi M-T (2012) The effect of paleoecology and  
675 paleobiogeography on stable isotopes of Quaternary mammals from South  
676 America. *Quat Sci Rev* 55, 103–113.
- 677 25. Ayliffe L-K, Lister A-M, Chivas A-R (1992) The preservation of glacial  
678 interglacial climatic signatures in the oxygen isotopes of elephant skeletal  
679 phosphate. *Palaeogeogr Palaeoclimatol Palaeoecol* 99, 179–191.
- 680 26. Rozanski K, Araguas-Araguas L, Gonfiantini R, (1993) Isotopic patterns in  
681 modern global precipitation. In: Swart, P.K., Lohmann, K.C., McKenzie, J.,  
682 Savin, S. (Eds.), *Climate Change in Continental Isotopic Records* 78, pp 1–36.  
683 *Geophys Monogr Ser.*
- 684 27. Kohn M-J, (2010) Carbon isotope compositions of terrestrial  $\text{C}_3$  plants as  
685 indicators of paleoecology and paleoclimate. *Proc Natl Acad Sci USA* 107(46):  
686 19691–19695.
- 687 28. Asevedo L, Winck G-R, Mothé D, Avilla L-S (2012) Ancient diet of the  
688 Pleistocene gomphothere *Notiomastodon platensis* (Mammalia, Proboscidea,



689 Gomphotheriidae) from lowland mid-latitudes of South America:  
690 Stereomicrowear and tooth calculus analyses combined. *Quat Int* 255, 42–52.  
691 29. Rivals F, Solounias N, Mithlacher M-C (2007) Evidence for geographic  
692 variation in the diets of late Pleistocene and early Holocene *Bison* in North  
693 America, and differences from the diets of recent *Bison*. *Quat Res* 68, 338–346.  
694 30. Wesolowski V., Souza, S.M.F.M., de, Reinhard, K.J., Ceccantini, G., 2007.  
695 Grânulos de amido e tólitos em cálculos dentários humanos: contribuição ao  
696 estudo do modo de vida e subsistência de grupos sambaquianos do litoral sul  
697 do Brasil. *Rev Museu Arqueol Etnol* (São Paulo) 17, 191–210.  
698 31. Maher L-J (1981) Statistics for microfossil concentration measurements  
699 employing samples spiked with marker grains. *Rev Palaeobot Palynol* 32, 153-  
700 191.  
701 32. Wesolowski V, de Souza S-M-F-M, Reinhard K-J, Ceccantini G (2010)  
702 Evaluating microfossil content of dental calculus from Brazilian sambaquis. *J*  
703 *Archaeol Sci* 37(6): 1326–1338.  
704 33. Stafford T-W, Brendel K, Duhamel R-C (1988) Radiocarbon, <sup>13</sup>C and <sup>15</sup>N  
705 analysis of fossil bone: removal of humates with XAD-2 resin. *Geochim*  
706 *Cosmochim Acta*, 52(9): 2257–2267.  
707 34. Stuiver M, Reimer P (1986–2014) Calib Radiocarbon Calibration Program.  
708 35. Luebert F, Plissock P (2006) *Sinopsis bioclimática y vegetal de Chile*.  
709 Editorial Universitaria.  
710 36. Dantas M, et al. (2017) Isotopic paleoecology of the Pleistocene  
711 megamammals from the Brazilian Intertropical Region: Feeding ecology ( $\delta^{13}\text{C}$ ),  
712 niche breadth and overlap. *Quat Sci Rev* 170, 152–163.

- 713 37. Bocherens H, et al. (2016). Paleobiology of sabretooth cat *Smilodon*  
714 *populator* in the Pampean Region (Buenos Aires Province, Argentina) around  
715 the Last Glacial Maximum: Insights from carbon and nitrogen stable isotopes in  
716 bone collagen. *Palaeogeogr Palaeoclimatol Palaeoecol* 449, 463–474.
- 717 38. Prevosti F-J, Martin F-M (2013) Paleoecology of the mammalian predator  
718 guild of Southern Patagonia during the latest Pleistocene: ecomorphology,  
719 stable isotopes, and taphonomy. *Quat Int* 305 74–84.
- 720 39. Sánchez B, Prado J-L, Alberdi M-T (2004) Feeding ecology, dispersal, and  
721 extinction of South American Pleistocene gomphotheres (Gomphotheriidae,  
722 Proboscidea). *Paleobiology* 30, 146–161.
- 723  
724
